# Supplementary material for: Selenium-transition metal supported on a mixture of reduced graphene oxide and silica template for water splitting
Source: Royal Society of Chemistry journal article supplement (doi:10.1039/d3ra01945d), 2023-01-01
Supplement: d3ra01945d1.pdf [file d3ra01945d1.pdf]

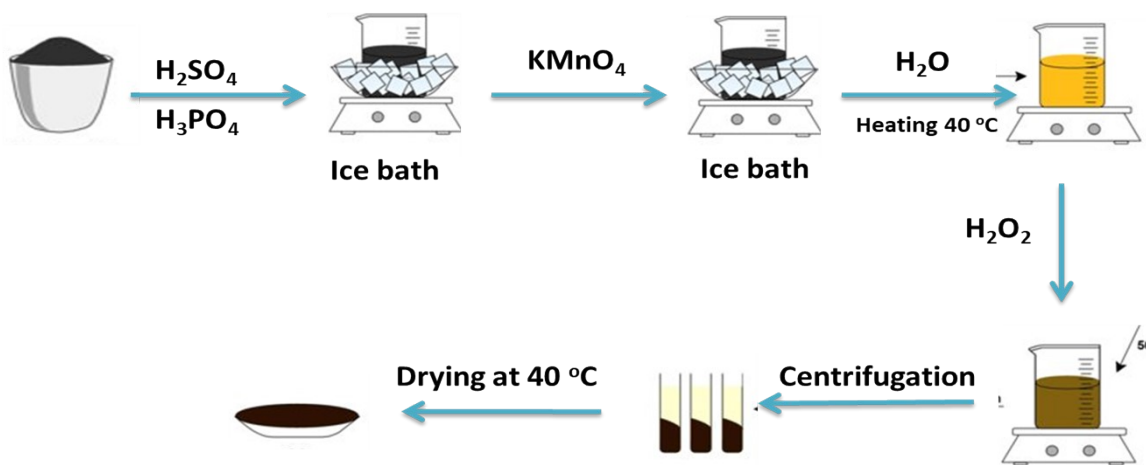

**Scheme 1:** Procedure of Graphene oxide preparation

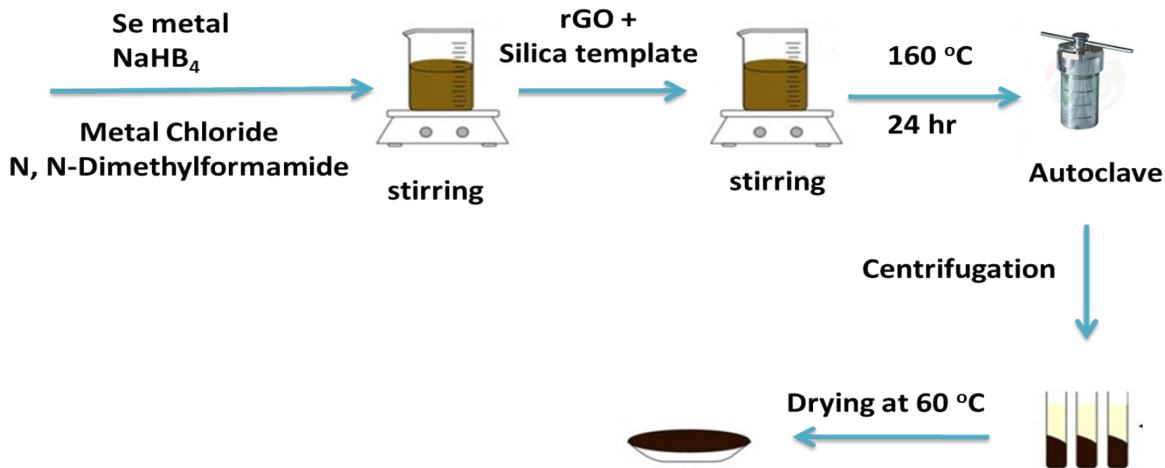

**Scheme 2:** Procedure of Selenium-transition metal supported on rGO and ST Preparation

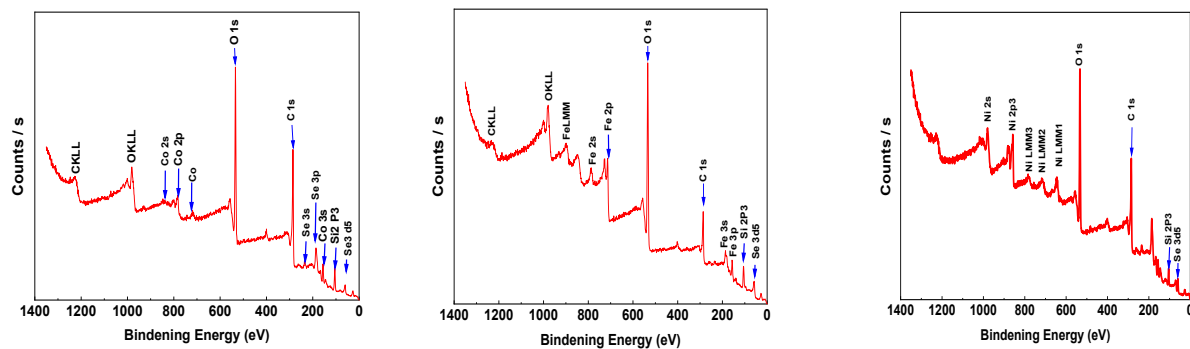

**Fig. S1.** High-resolution XPS spectra survey of (a)  $\text{CoSeO}_3/\text{rGO-ST}$ , (b)  $\text{FeSe}_2/\text{rGO-ST}$ , (c)  $\text{NiSe}/\text{rGO-ST}$  electrocatalysts.

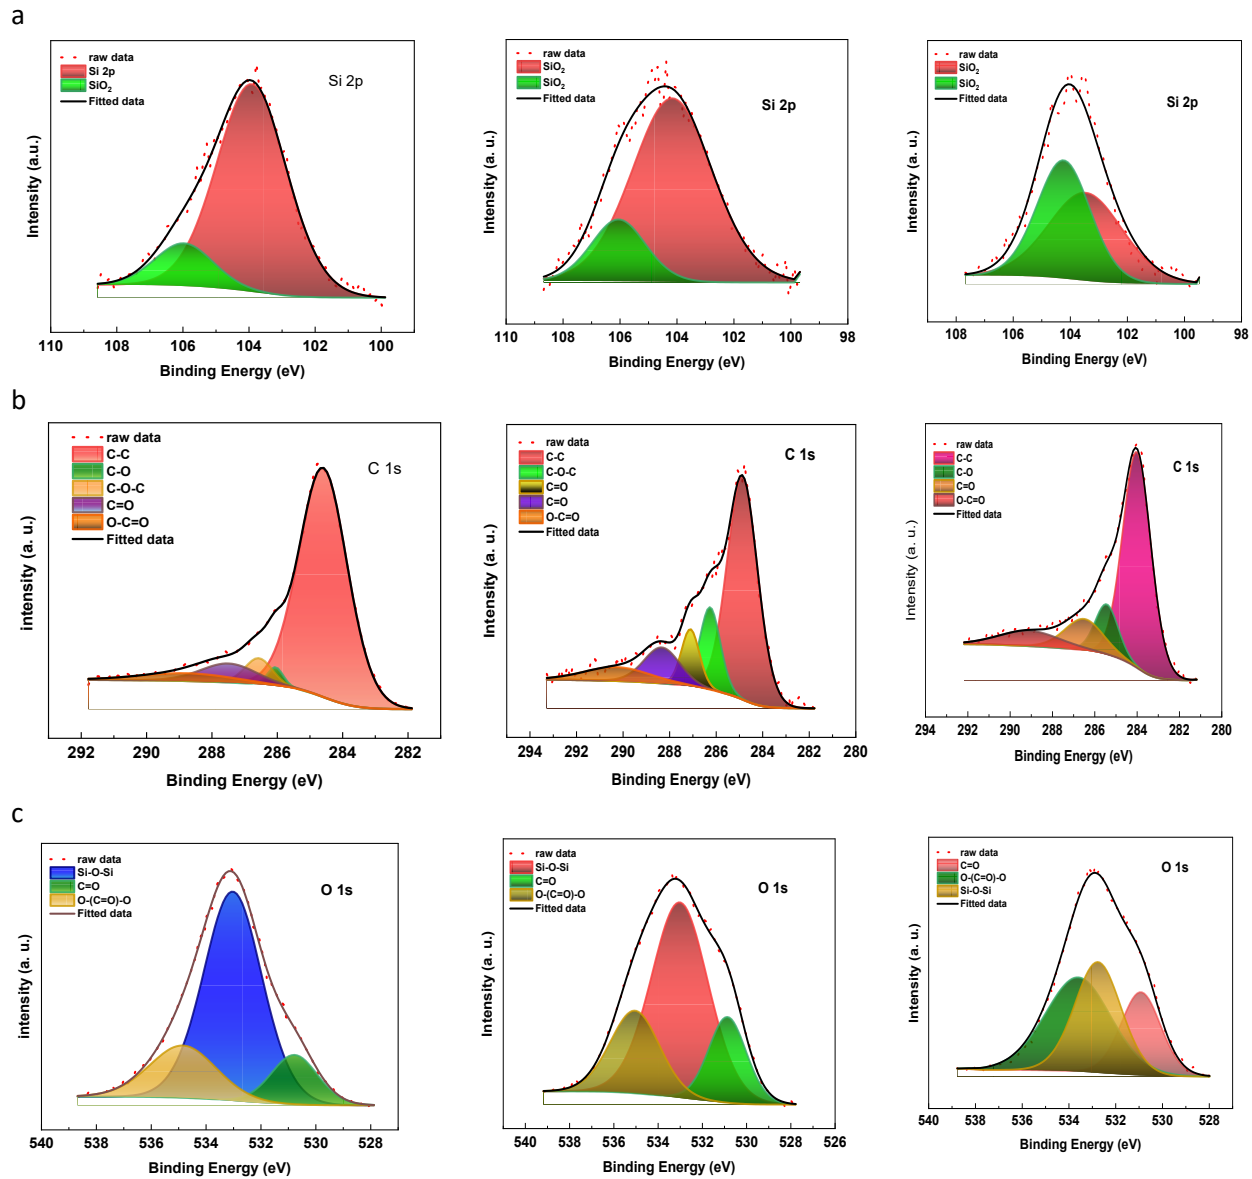

**Fig. S2.** High-resolution XPS spectra of (a) Si2p , (b) C 1s, (c) O 1s of of CoSeO<sub>3</sub>/rGO-ST, FeSe<sub>2</sub>/rGO-ST and NiSe/rGO-ST electrocatalysts.

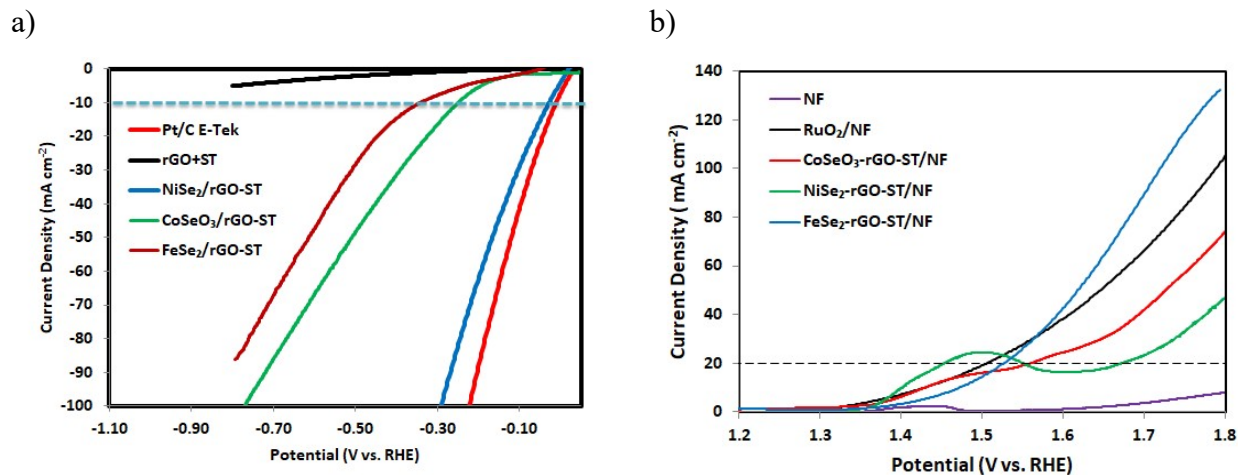

**Fig.S3: LSV curve without IR correction of the electrocatalysts (a) HER curves, (b) OER**

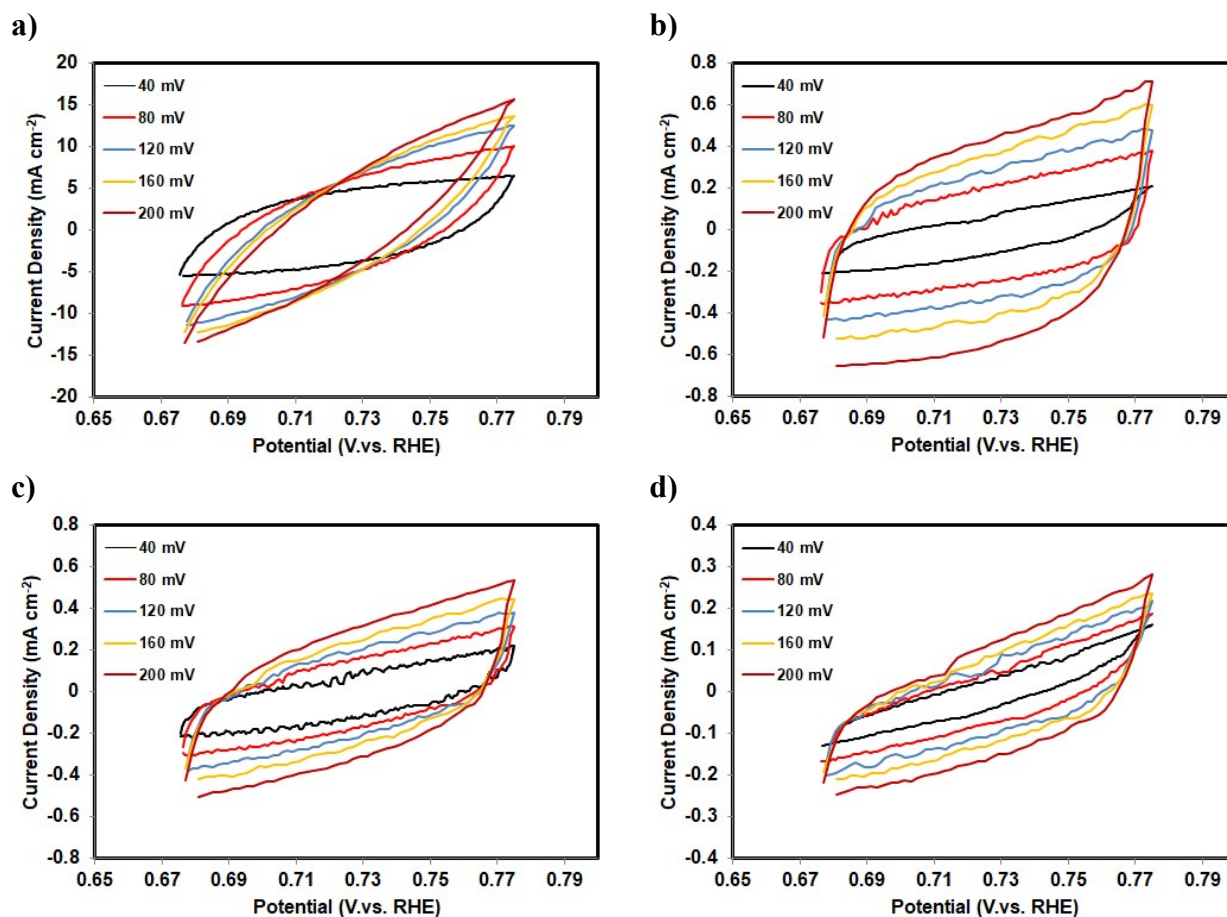

**Fig. S4: Non-faradaic CV scans of Pt/C E-TEK a), NiSe<sub>2</sub>/rGO-ST b), CoSeO<sub>3</sub>/rGO-ST c) and FeSe<sub>2</sub>/rGO-ST d) for HER at different scan rate**

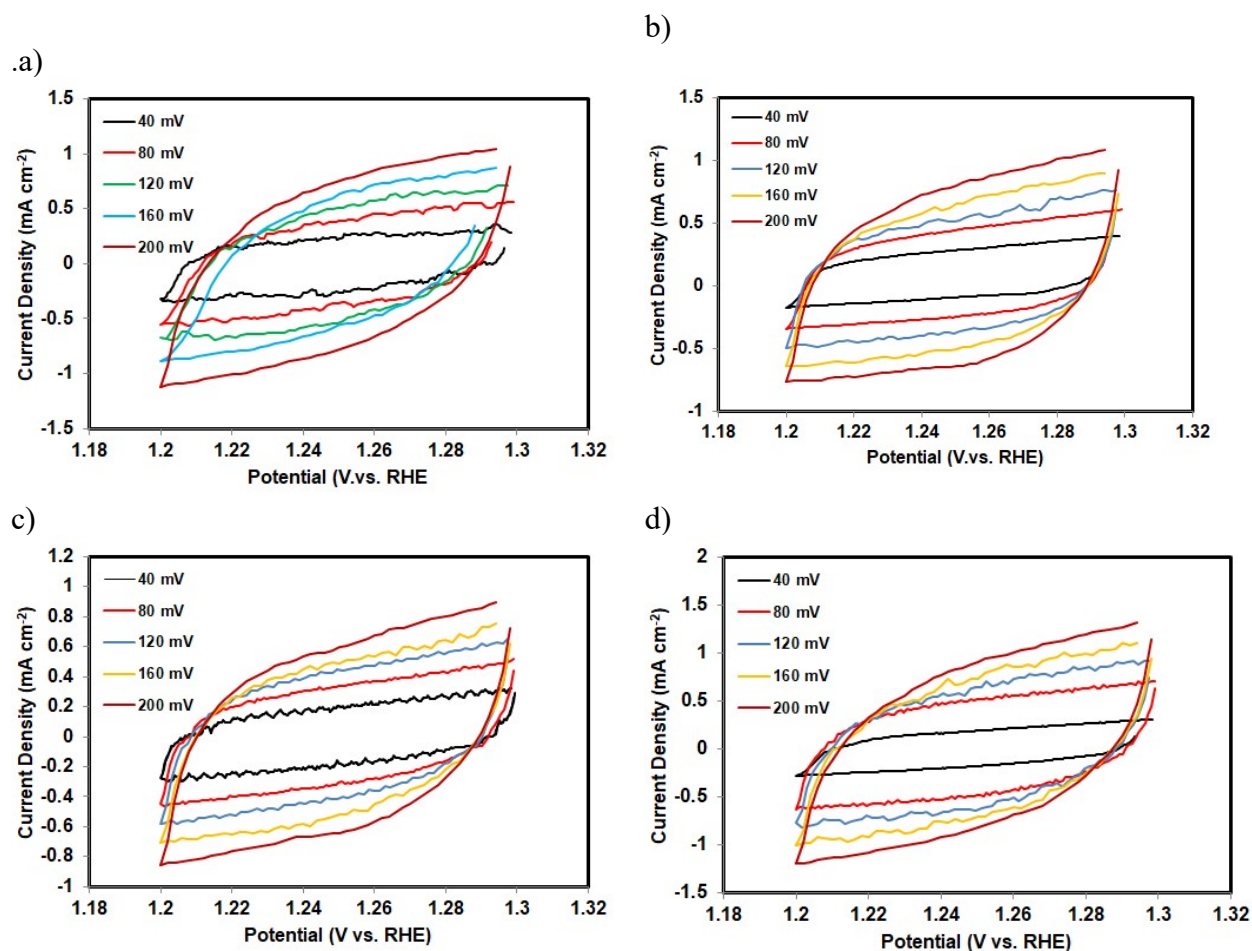

Fig. S5: Non-faradaic CV scans of RuOx a), NiSe<sub>2</sub>/rGO-ST b), CoSeO<sub>3</sub>/rGO-ST c) and FeSe<sub>2</sub>/rGO-ST d) for OER at different scan rate

Table S1: The Rs, CPE, and Rct values for Pt/C E-TEK, NiSe<sub>2</sub>/rGO-ST, CoSeO<sub>3</sub>/rGO-ST and FeSe<sub>2</sub>/rGO-ST

| Electrocatalyst            | Rs (Ω) | Rp      | CPE        | Rct    | CPE        |
|----------------------------|--------|---------|------------|--------|------------|
| Pt/C                       | 10.52  | 4.0811  | 0.00080503 | 27.296 | 0.056829   |
| NiSe <sub>2</sub> /rGO-ST  | 12.844 |         |            | 87.412 | 0.00092401 |
| CoSeO <sub>3</sub> /rGO-ST | 7.5243 | 0.72285 | 0.00031961 | 40.079 | 0.051609   |
| FeSe <sub>2</sub> /rGO-ST  | 12.46  |         |            | 168.9  | 0.0011552  |
